# Supplementary material for: Dynamic Changes in Human Milk Oligosaccharides in Chinese Population: A Systematic Review and Meta-Analysis
Source: MDPI journal article supplement (doi:10.3390/nu13092912), 2021-08-24
Supplement: s1 [file s1]

**Table S1.** Inclusion and exclusion criteria of article selection

| Parameter           | Inclusion criteria                                                                                                                                                                 | Exclusion criteria                                                                                                                                                                                                                              |
|---------------------|------------------------------------------------------------------------------------------------------------------------------------------------------------------------------------|-------------------------------------------------------------------------------------------------------------------------------------------------------------------------------------------------------------------------------------------------|
| <b>Population</b>   | Chinese population; healthy mothers with healthy neonates.                                                                                                                         | Non-Chinese populations; non-human; mothers or infants with defined diseases or disorders; population without defined location in China.                                                                                                        |
| <b>Intervention</b> | N/A                                                                                                                                                                                | N/A                                                                                                                                                                                                                                             |
| <b>Comparator</b>   | N/A                                                                                                                                                                                | N/A                                                                                                                                                                                                                                             |
| <b>Outcomes</b>     | Absolute concentrations of a single HMOs<br>Mean values $\pm$ Standard Deviation<br>Single HMOs concentration values with $n \geq 2$ at given lactation period or secretor status. | Lactation stages were not specified<br>Milk samples were pooled together before component analysis<br>levels of individual HMOs not reported<br>Concentrations of mixtures of HMOs<br>Median values or relative concentrations.                 |
| <b>Study design</b> | Original articles from peer-reviewed journals; articles in Chinese from “core” Chinese journals or thesis.                                                                         | Review articles; abstracts; articles without access to full texts; for articles that reported the same study (e.g., theses and journal articles that reported the same study), the theses which reported more comprehensive data were included. |

**Table S2.** Quality assessment of included studies

| <b>Question</b>                                                                                                                                                      | <b>[4]</b>     | <b>[14]</b> | <b>[29]</b>    | <b>[30]</b> | <b>[31]</b> | <b>[32]</b> | <b>[33]</b> | <b>[34]</b> |
|----------------------------------------------------------------------------------------------------------------------------------------------------------------------|----------------|-------------|----------------|-------------|-------------|-------------|-------------|-------------|
| <b>Q1:</b> Did the authors clearly describe the period of investigation?                                                                                             | Y <sup>1</sup> | Y           | Y              | Y           | Y           | Y           | Y           | Y           |
| <b>Q2:</b> Did the authors clearly describe the number of mothers recruited in the study?                                                                            | Y              | Y           | N <sup>2</sup> | Y           | N           | Y           | Y           | Y           |
| <b>Q3:</b> Did the authors describe clearly that the infants were full-term or pre-term?                                                                             | Y              | Y           | Y              | N           | N           | Y           | Y           | Y           |
| <b>Q4:</b> Did the authors describe the delivery mode?                                                                                                               | N              | N           | N              | N           | N           | N           | N           | N           |
| <b>Q5:</b> Did the authors describe clearly that the mothers and infants were healthy?                                                                               | Y              | Y           | Y              | Y           | Y           | Y           | Y           | Y           |
| <b>Q6:</b> Was there dietary intervene the diet on the mothers in the study?                                                                                         | N              | N           | N              | N           | N           | N           | N           | N           |
| <b>Q7:</b> Did the authors report the secretor status or Lewis types of the samples?                                                                                 | N              | Y           | N              | N           | N           | N           | Y           | N           |
| <b>Q8:</b> Did the authors clearly describe the site where the human milk samples were collected?                                                                    | Y              | Y           | Y              | Y           | Y           | Y           | Y           | Y           |
| <b>Q9:</b> Did the authors clearly describe the time of the day when human milk was collected, or all human milk were collected at the same time range of the day?   | Y              | Y           | N              | N           | N           | Y           | Y           | N           |
| <b>Q10:</b> Did the authors describe clearly human milk was foremilk, hindmilk or full expression?                                                                   | Y              | Y           | Y              | N           | N           | Y           | Y           | N           |
| <b>Q11:</b> Did the authors provide detailed determination method of fatty acids in human milk?                                                                      | Y              | Y           | Y              | Y           | Y           | Y           | Y           | Y           |
| <b>Q12:</b> Did the authors describe funding sources (for-profit organizations, non-profit funding, or government funding) and conflicts of interest of the authors? | Y              | N           | Y              | N           | Y           | Y           | Y           | Y           |

<sup>1</sup> Yes; <sup>2</sup> No.

**Table S3.** Blueprint of HMOs

| Abbreviation | IUPAC-condensed nomenclature                          | Symbol Nomenclature for Glycans                                                       |
|--------------|-------------------------------------------------------|---------------------------------------------------------------------------------------|
| 2'-FL        | Fuc(a1-2)Gal(b1-4)Glc                                 | 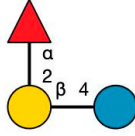   |
| 3'-FL        | Gal(b1-4)[Fuc(a1-3)]Glc                               |    |
| 3'-SL        | Neu5Ac(a2-3)Gal(b1-4)Glc                              |    |
| 6'-SL        | Neu5Ac(a2-6)Gal(b1-4)Glc                              |  |
| LNT          | Gal(b1-3)GlcNAc(b1-3)Gal(b1-4)Glc                     |  |
| LNnT         | Gal(b1-4)GlcNAc(b1-3)Gal(b1-4)Glc                     |  |
| LNDFH I      | Fuc(a1-2)Gal(b1-3)[Fuc(a1-4)]GlcNAc(b1-3)Gal(b1-4)Glc |  |

LNDFH II

Fuc(a1-4)[Gal(b1-3)]GlcNAc(b1-3)Gal(b1-4)[Fuc(a1-3)]Glc

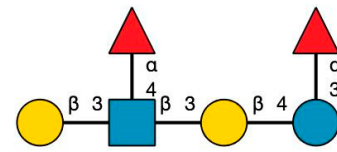

DSLNT

Neu5Ac(a2-3)Gal(b1-3)[Neu5Ac(a2-6)]GlcNAc(b1-3)Gal(b1-4)Glc

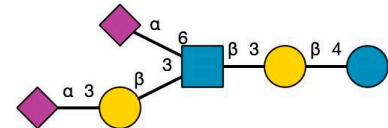

LNFP I

Fuc(a1-2)Gal(b1-3)GlcNAc(b1-3)Gal(b1-4)Glc

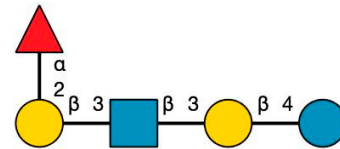

LNFP II

Fuc(a1-4)[Gal(b1-3)]GlcNAc(b1-3)Gal(b1-4)Glc

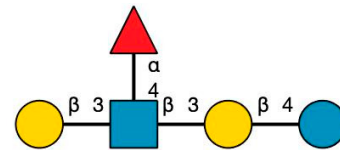

LNFP III

Fuc(a1-3)[Gal(b1-4)]GlcNAc(b1-3)Gal(b1-4)Glc

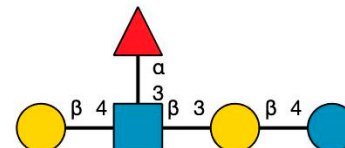

LNFP V

Gal(b1-3)GlcNAc(b1-3)Gal(b1-4)[Fuc(a1-3)]Glc

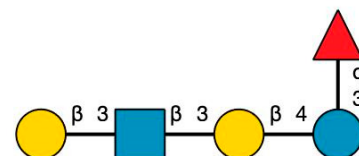

LSTc

Neu5Ac(a2-6)Gal(b1-4)GlcNAc(b1-3)Gal(b1-4)Glc

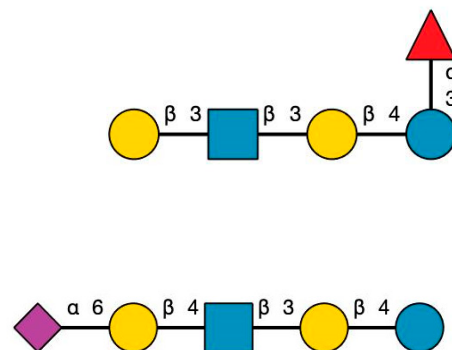

---

|                                          |        |                                                                                      |
|------------------------------------------|--------|--------------------------------------------------------------------------------------|
| Gal(Galactose)                           | Gal    |   |
| Glc(Glucose)                             | Glc    |   |
| GlcNAc( <i>N</i> -acetylglucosamine)     | GlcNAc |   |
| Fuc(Fucose)                              | Fuc    |   |
| Neu5Ac( <i>N</i> -acetylneuraminic acid) | Neu5Ac |  |

---

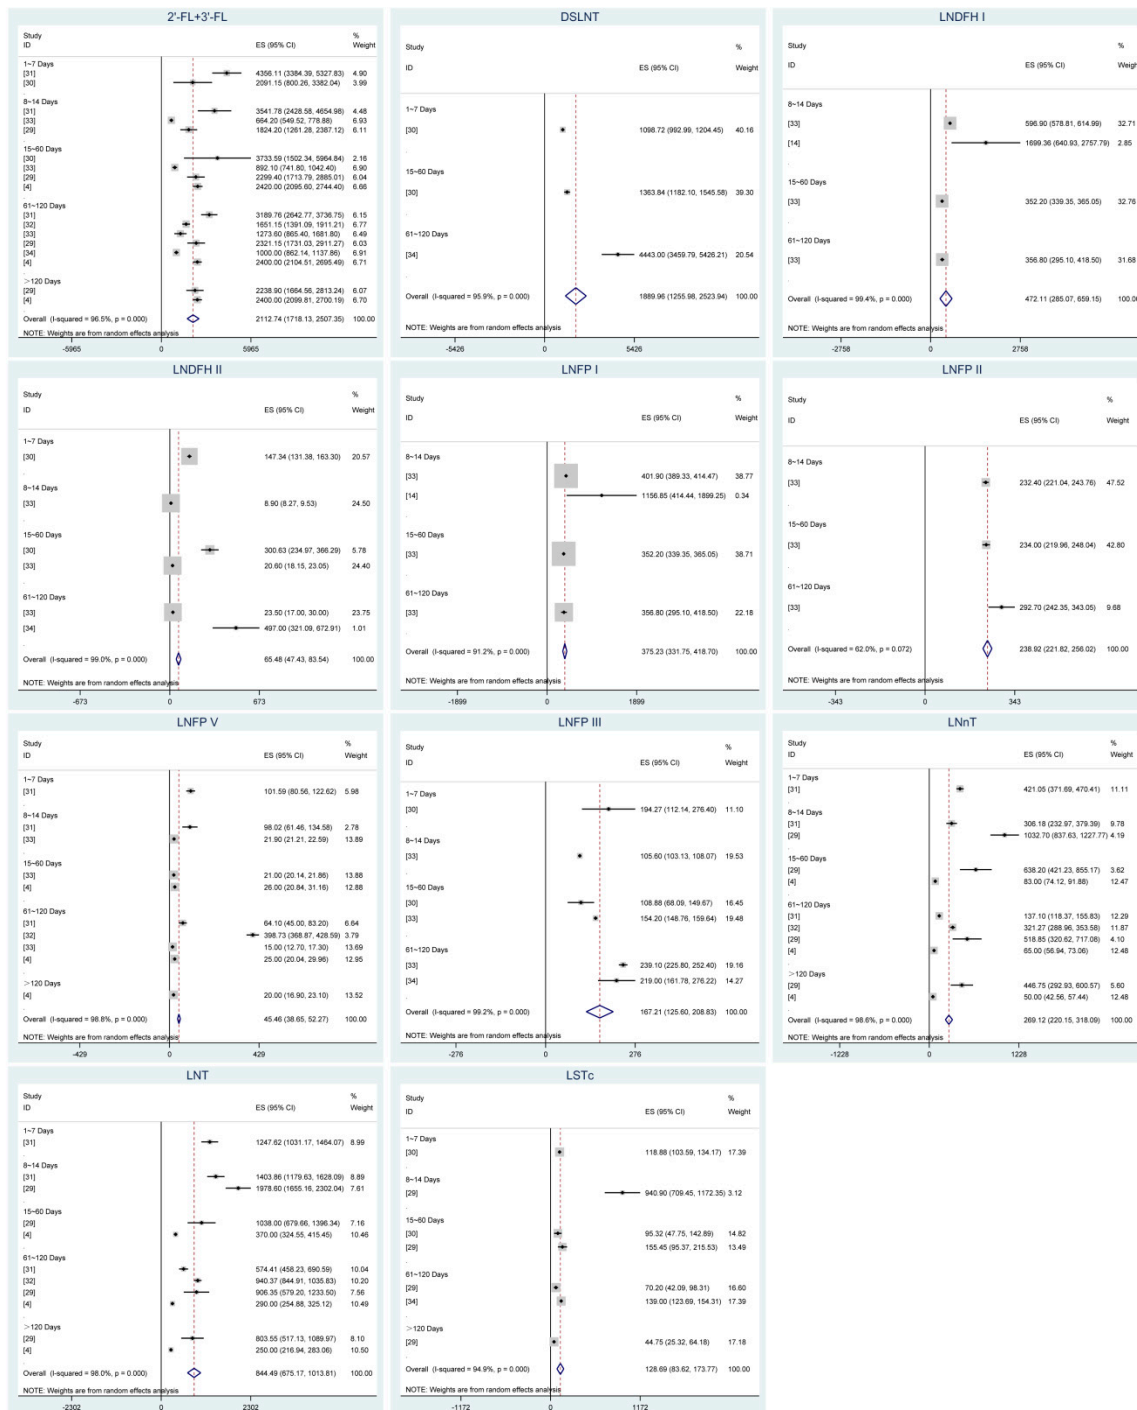

Figure S1. Forrest plots of HMO concentrations of included studies

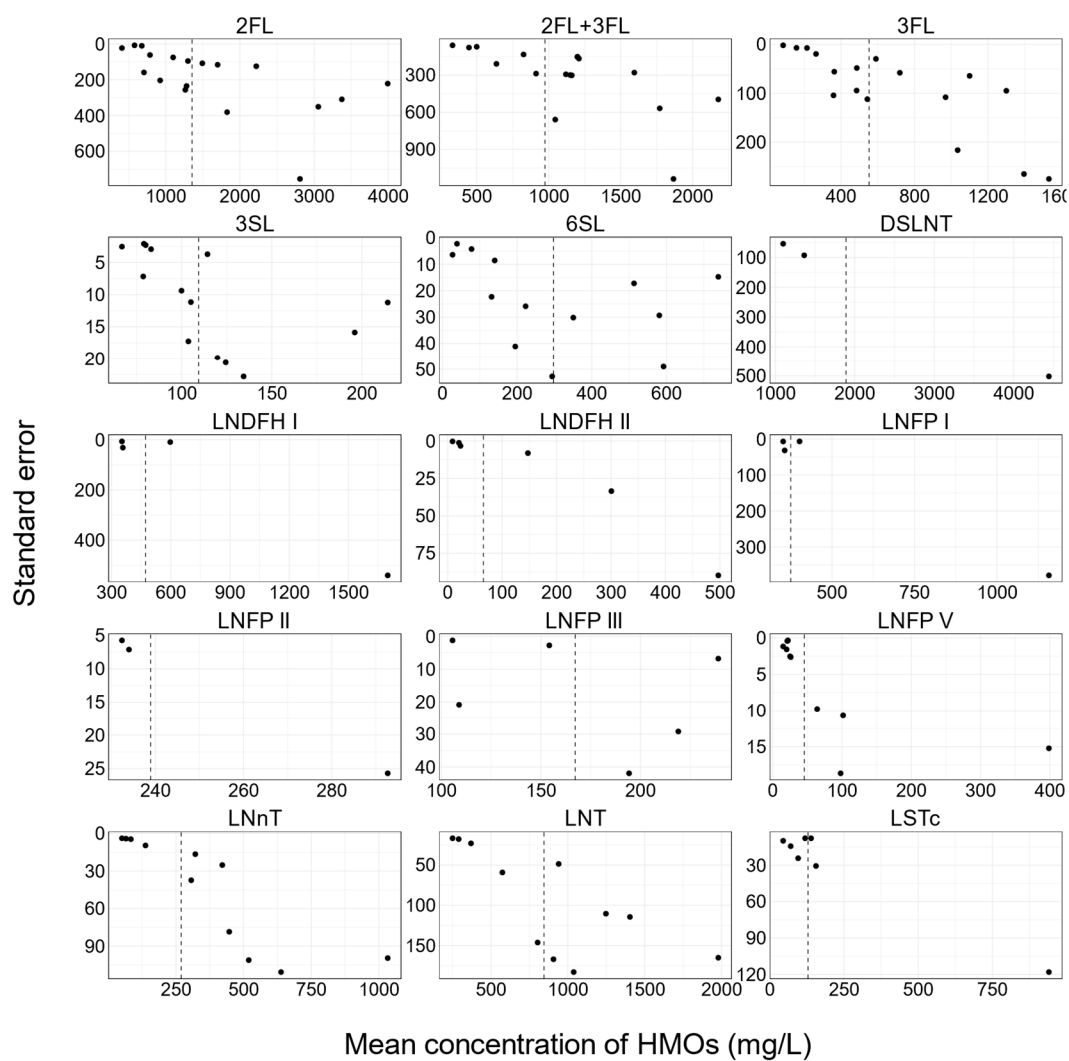

**Figure S2.** Publication biases of included studies
